# Supplementary material
Source: HighWire-hosted journal article supplement (https://ez-admanager.com/highwire/filestream/134139/field_highwire_adjunct_files/0/MDZ_in_SE.pdf)
Supplement: MDZ_in_SE.pdf [file MDZ_in_SE.pdf]

## High-dose midazolam infusion for refractory status epilepticus

### الجرعة العالية من الميدازولام المستمر عن طريق الوريد لعلاج الحالة الصرعية المستعصية

**الغاية:** تقارن هذه الدراسة بين بروتوكولي علاج يسمحان باستخدام جرعة عالية مقابل جرعة منخفضة من الميدازولام المستمر عن طريق الوريد.

**طريقة البحث:** قارنا البالغين الذين يعانون من الحالة الصرعية المستعصية باستخدام جرعة عالية من الميدازولام المستمر عن طريق الوريد (عدد المرضى = 100, بين عامي 2002 و 2011) مع هؤلاء الذين عولجوا باستخدام الجرعة المنخفضة السابقة (عدد المرضى = 29 بين عامي 1996 و 2000). جمعنا بيانات عن الخصائص الأساسية و جرعة الميدازولام و السيطرة على الصرع و سير الرعاية المستشفى و النتيجة النهائية.

**النتائج:** كان متوسط الجرعة القصوى من ميدازولام 0.4 ملغ / كغ / ساعة ( Interquartile range ) 0.2, 1.0 (IQR)) في مجموعة الجرعة العالية و 0.2 ملغ / كغ / ساعة (IQR 0.1, 0.3) في مجموعة الجرعة المنخفضة ( $p < 0.001$ ) مع ثبات مدة العلاج. كان متوسط الزمن المنقضي بين بداية الحالة الصرعية و بداية الميدازولام المستمر عن طريق الوريد هو يوم واحد (IQR 1, 3) في مجموعة الجرعة العالية و يومين في مجموعة الجرعة المنخفضة ( $p = 0.016$ ). " تشنجات الانسحاب " التي تحدث خلال 48 ساعة من وقف الميدازولام كانت أقل تواترا في مجموعة الجرعة العالية (15% مقابل 64%) (نسبة ارجحية 0.1 , و فاصل ثقة 95 % 0.03 - 0.27). لم يوجد فرق بين المجموعتين في فشل الميدازولام النهائي (المرضى الذين يحتاجون إلى دواء مختلف من خلال الوريد لعلاج الصرع) و المضاعفات في المستشفى. انخفاض ضغط الدم كان أكثر تواترا في مجموعة الجرعة العالية دون ان يؤثر ذلك على النتيجة النهائية. كان معدل الوفيات أقل في مجموعة الجرعة العالية (40% مقابل 62%) (نسبة ارجحية 0.34 , و فاصل ثقة 95 % 0.13 - 0.92).

**الاستنتاجات:** يمكن استخدام الجرعة العالية من الميدازولام المستمر عن طريق الوريد لعلاج الحالة الصرعية المستعصية بسلام. ارتبطت هذه الجرعة العالية بانخفاض معدل تشنجات الانسحاب, و قد تكون مرتبطة مع انخفاض معدلات الوفيات مقارنة بالجرعة التقليدية المنخفضة.

**تصنيف الأدلة:** توفر هذه الدراسة أدلة من الدرجة الثالثة أن الميدازولام في أعلى معدلات ضخ يرتبط مع انخفاض في تكرار التشنجات خلال 48 ساعة من وقف الميدازولام, وقد يكون مرتبطاً بانخفاض الوفيات.

Objective: This study compares 2 treatment protocols allowing low vs high continuous IV midazolam (cIV-MDZ) doses.

Methods: We compared adults with refractory status epilepticus treated with a protocol allowing for high-dose cIV-MDZ (n = 100; 2002–2011) with those treated with the previous lower-dose cIV-MDZ (n = 29; 1996–2000). We collected data on baseline characteristics, cIV-MDZ doses, seizure control, hospital course, and outcome.

Results: Median maximum cIV-MDZ dose was 0.4 mg/kg/h (interquartile range [IQR] 0.2, 1.0) for the high-dose group and 0.2 mg/kg/h (IQR 0.1, 0.3) for the low-dose group ( $p < 0.001$ ) with similar duration of infusion. Median time from status epilepticus onset to cIV-MDZ start was 1 day (IQR 1, 3) for the high-dose group and 2 days (IQR 1, 5) for the low-dose group ( $p = 0.016$ ). “Withdrawal seizures” (occurring within 48 hours of discontinuation of cIV-MDZ) were less frequent in the high-dose group (15% vs 64%, odds ratio 0.10, 95% confidence interval 0.03–0.27). “Ultimate cIV-MDZ failure” (patients requiring change to a different cIV antiepileptic medication) and hospital complications were not different between groups. Hypotension was more frequent with higher cIV-MDZ doses but was not associated with worse outcome. Discharge mortality was lower in the high-dose group (40% vs 62%, odds ratio 0.34, 95% confidence interval 0.13–0.92 in multivariate analysis).

Conclusions: High-dose cIV-MDZ treatment of refractory status epilepticus can be performed safely, is associated with a lower seizure rate after cIV-MDZ discontinuation, and may be associated with lower mortality than traditional lower-dose protocols.

Classification of evidence: This study provides Class III evidence that midazolam at higher infusion rates is associated with a reduction in seizure recurrence within 48 hours after discontinuation and may be associated with lower mortality.

---

**Translator: Saad Kanaan MD, Department of Neurology, University of Oklahoma Health Sciences Center, Oklahoma City, OK.**

**Translation Reviewer: Mohamed Kazamel MD, Department of Neurology, Mayo Clinic, Rochester, MN.**
